# Supplementary material
Source: publisher figshare collection journal article supplement (https://frontiersin.figshare.com/ndownloader/files/28528989)
Supplement: Supplementary file [file 28528989]

## 1.Detailed information of the differentially expressed proteins

### 1.1 Information for each significantly up-regulated protein (P < 0.05) identified in DM vs HM group

| UniProt<br>Accession no. | Protein Name                       | Gene Name    | LFQ intensity |          |          |          |          |          | Fold<br>change | t test p<br>value |
|--------------------------|------------------------------------|--------------|---------------|----------|----------|----------|----------|----------|----------------|-------------------|
|                          |                                    |              | DM-1          | DM-2     | DM-3     | HM-1     | HM-2     | HM-3     |                |                   |
| B7VGF9                   | Alpha-S2-casein                    | CSN1S2       | 7.57E+11      | 5.82E+11 | 5.40E+11 | 3.68E+07 | 1.75E+07 | 1.07E+07 | 2.89E+04       | 7.05E-04          |
| P11375                   | Lysozyme C                         | LYZ          | 2.14E+11      | 1.83E+11 | 1.58E+11 | 1.47E+08 |          | 5.98E+07 | 1.79E+03       | 3.14E-03          |
| P86272                   | Alpha-S1-casein                    | CSN1S1       | 3.75E+11      | 4.32E+11 | 5.01E+11 | 9.40E+08 | 1.06E+08 | 1.08E+08 | 1.13E+03       | 2.80E-04          |
| P28546                   | Alpha-lactalbumin                  | LALBA        | 3.42E+11      | 3.19E+11 | 3.74E+11 | 1.01E+09 | 1.78E+08 | 2.25E+08 | 7.34E+02       | 2.63E-05          |
| F7C0Y4                   | amyloid A protein                  | LOC100056936 | 6.72E+10      | 6.67E+10 | 3.91E+10 | 1.66E+08 | 2.57E+08 | 1.12E+07 | 3.99E+02       | 3.45E-03          |
| P86273                   | Beta-casein                        | CSN2         | 4.54E+11      | 4.91E+11 | 5.32E+11 | 1.95E+09 | 1.54E+09 | 9.51E+08 | 3.33E+02       | 2.59E-05          |
| H9GZV1                   | Uncharacterized<br>protein         |              | 1.81E+10      | 2.24E+10 | 3.63E+10 | 2.06E+08 | 6.74E+06 |          | 2.41E+02       | 3.65E-02          |
| A0A3Q2HYP3               | phosphoprotein 1                   | SPP1         | 7.30E+10      | 7.48E+10 | 5.77E+10 | 6.72E+08 | 2.75E+07 |          | 1.96E+02       | 2.32E-03          |
| F7B0S3                   | Uncharacterized<br>protein         | MFGE8        | 1.40E+11      | 1.33E+11 | 6.57E+10 | 1.10E+09 | 1.38E+09 | 1.94E+09 | 7.67E+01       | 9.33E-03          |
| P02758                   | Beta-LG-1                          | LGB1         | 3.15E+11      | 3.36E+11 | 3.82E+11 | 1.76E+10 | 2.13E+08 | 2.37E+08 | 5.73E+01       | 8.03E-05          |
| A0A3Q2HRJ9               | acid receptor<br>responder 1       | RARRES1      | 3.90E+08      | 4.57E+08 | 4.49E+08 |          | 1.18E+07 | 5.71E+06 | 4.92E+01       | 5.71E-04          |
| F6W1N4                   | immunoglobulin<br>receptor         | PIGR         | 9.76E+09      | 1.02E+10 | 1.15E+10 | 3.46E+08 | 1.82E+08 | 2.17E+08 | 4.22E+01       | 3.84E-05          |
| F7DDN1                   | acid synthase                      | FASN         | 6.53E+09      | 2.50E+09 | 3.50E+09 | 1.82E+08 | 2.69E+08 | 3.04E+08 | 1.66E+01       | 3.16E-02          |
| A0A3Q2HN20               | albumin                            | ALB          | 5.26E+10      | 5.02E+10 | 6.40E+10 | 6.14E+09 | 1.53E+09 | 3.12E+09 | 1.55E+01       | 3.08E-04          |
| A0A3Q2HGD0               | ATPase                             | ATP2B2       | 4.25E+08      | 3.99E+08 | 4.45E+08 |          | 5.91E+07 | 1.75E+07 | 1.10E+01       | 4.79E-04          |
| Q13162                   | AOE37-2                            | PRDX4        | 2.77E+08      | 4.52E+08 | 2.49E+08 | 3.53E+07 | 4.30E+07 | 4.93E+07 | 7.68E+00       | 1.11E-02          |
| A0A3Q2H4E3               | carrier family 34<br>member 2      | SLC34A2      | 1.97E+09      | 2.52E+09 | 1.26E+09 | 4.67E+08 | 3.59E+08 |          | 4.64E+00       | 4.99E-02          |
| F7BPT4                   | Ezrin                              | EZR          | 1.07E+09      | 4.96E+08 | 5.51E+08 | 1.03E+08 | 2.26E+08 | 1.72E+08 | 4.23E+00       | 4.49E-02          |
| F6Q9R1                   | Perilipin                          | PLIN2        | 8.01E+09      | 9.59E+09 | 8.82E+09 | 3.04E+09 | 2.49E+09 | 7.79E+08 | 4.19E+00       | 1.22E-03          |
| A0A3Q2HNI5               | II alpha subunit                   | GANAB        | 1.39E+09      | 1.35E+09 | 1.11E+09 | 2.75E+08 | 4.85E+08 | 4.10E+08 | 3.30E+00       | 1.09E-03          |
| A0A0B4J1C4               | chain of multimeric IgA<br>and IgM | JCHAIN       | 3.72E+09      | 4.01E+09 | 5.72E+09 | 1.64E+09 | 1.26E+09 | 1.60E+09 | 2.99E+00       | 9.34E-03          |
| F7AQZ6                   | kinase                             | LYN          | 2.22E+08      | 2.09E+08 | 1.57E+08 |          | 5.87E+07 | 8.67E+07 | 2.70E+00       | 2.12E-02          |
| F6Z2L5                   | Apolipoprotein A1                  | APOA1        | 1.40E+09      | 2.82E+09 | 2.11E+09 | 8.93E+08 | 5.89E+08 | 9.45E+08 | 2.61E+00       | 3.70E-02          |
| F7D8I6                   | Xanthine<br>dehydrogenase          | LOC100054601 | 5.62E+10      | 8.46E+10 | 5.39E+10 | 2.15E+10 | 2.27E+10 | 3.66E+10 | 2.41E+00       | 2.62E-02          |

|            |                                                            |          |          |          |          |  |  |  |  |  |
|------------|------------------------------------------------------------|----------|----------|----------|----------|--|--|--|--|--|
| A0A3Q2I8J7 | lectin domain-containing protein                           |          | 6.50E+06 | 8.10E+06 |          |  |  |  |  |  |
| F7CLE3     | pyrophosphatase/phosphodiesterase 3                        | ENPP3    | 8.32E+06 | 1.57E+07 |          |  |  |  |  |  |
| K9KFF1     | protein (Fragment)                                         |          | 8.69E+06 | 9.23E+06 |          |  |  |  |  |  |
| Q9TQV1     | Transferrin(Fragment)                                      |          | 8.73E+06 | 2.58E+07 | 1.30E+07 |  |  |  |  |  |
| K9KB26     | emp24 domain-containing protein 10-like protein (Fragment) |          | 8.76E+06 | 7.46E+06 |          |  |  |  |  |  |
| F6TBM0     | 17-beta-dehydrogenase 11-like protein                      | HSD17B11 | 9.78E+06 | 6.47E+07 |          |  |  |  |  |  |
| F6TL52     | kinase isoenzyme 1                                         | AK1      | 1.01E+07 | 1.05E+07 |          |  |  |  |  |  |
| A0A3Q2I9V2 | transport protein                                          | SFT2D2   | 1.03E+07 | 1.43E+07 | 1.47E+07 |  |  |  |  |  |
| A0A3Q2HV56 | protein                                                    | RPL11    | 1.06E+07 | 7.73E+06 |          |  |  |  |  |  |
| Q13228     | oxidase                                                    | SELENBP1 | 1.17E+07 | 2.76E+07 |          |  |  |  |  |  |
| F6PNM1     | cell derived factor 4                                      | SDF4     | 1.20E+07 | 7.67E+06 | 1.49E+07 |  |  |  |  |  |
| Q861L3     | class I antigen (Fragment)                                 |          | 1.20E+07 | 2.44E+07 |          |  |  |  |  |  |
| A0A3Q2HQH1 | domain-containing protein                                  |          | 1.26E+07 | 1.35E+07 |          |  |  |  |  |  |
| F6Y426     | Nucleobindin 2                                             | NUCB2    | 1.27E+07 | 1.26E+07 | 1.23E+07 |  |  |  |  |  |
| P69905     | subunit alpha                                              | HBA1     | 1.30E+07 | 2.39E+07 |          |  |  |  |  |  |
| P62826     | nuclear protein Ran                                        | RAN      | 1.30E+07 | 5.19E+06 | 4.74E+06 |  |  |  |  |  |
| K9KEF8     | reticulum resident protein ERp44-like protein (Fragment)   |          | 1.32E+07 | 1.43E+07 | 1.20E+07 |  |  |  |  |  |
| L7MRN0     | aminotransferase (Fragment)                                | GOT1     | 1.47E+07 | 1.11E+07 |          |  |  |  |  |  |
| P14625     | GRP-94                                                     | HSP90B1  | 1.54E+07 | 1.27E+07 | 3.33E+07 |  |  |  |  |  |
| F7B4C0     | domain-containing protein                                  | MAL2     | 1.60E+07 | 3.16E+07 | 3.28E+07 |  |  |  |  |  |
| P01834     | kappa constant                                             | IGKC     | 1.72E+07 | 6.29E+06 |          |  |  |  |  |  |
| K9K4A9     | protein Rap-2c-like protein (Fragment)                     |          | 1.74E+07 | 2.43E+07 |          |  |  |  |  |  |
| A0A3Q2HIU8 | fragment of IgA and IgM receptor                           | FCAMR    | 1.76E+07 | 2.42E+07 | 2.23E+07 |  |  |  |  |  |
| A8HDQ5     | disintegrin-metalloprotease                                |          | 1.76E+07 | 2.14E+07 |          |  |  |  |  |  |
| F7A676     | aminopeptidase 3                                           | LAP3     | 1.78E+07 | 2.95E+06 | 8.64E+05 |  |  |  |  |  |
| F6XSG4     | ATPase                                                     | ATP2B1   | 1.80E+07 | 4.83E+07 | 5.39E+07 |  |  |  |  |  |
| F6RCA8     | Peroxiredoxin-5                                            | PRDX5    | 1.92E+07 | 1.17E+07 | 1.09E+07 |  |  |  |  |  |

|            |                                        |              |          |          |          |  |  |  |  |  |
|------------|----------------------------------------|--------------|----------|----------|----------|--|--|--|--|--|
| F6RHD5     | phosphoribosyltransferase              | APRT         | 1.97E+07 | 1.80E+07 | 2.32E+07 |  |  |  |  |  |
| F6YSK7     |                                        | MARCKS       | 2.00E+07 |          | 5.85E+06 |  |  |  |  |  |
| A0A3Q2H6L1 | cofactor protein                       | LOC100057176 | 2.06E+07 | 2.26E+07 | 2.36E+07 |  |  |  |  |  |
| Q7L0Q8     | GTP-binding protein RhoU               | RHO          | 2.07E+07 | 3.67E+07 | 3.80E+07 |  |  |  |  |  |
| A0A3Q2IBB5 | glycoprotein 1                         | GLG1         | 2.09E+07 | 2.53E+07 |          |  |  |  |  |  |
| F6U5V3     | Transcobalamin 2                       | TCN2         | 2.13E+07 | 3.17E+07 | 3.53E+07 |  |  |  |  |  |
| H9GZL8     | acidic ribosomal protein P2            | RPLP2        | 2.15E+07 | 3.00E+07 | 3.94E+07 |  |  |  |  |  |
| A0A3Q2HWY7 |                                        | LOC100060539 | 2.20E+07 |          | 4.66E+07 |  |  |  |  |  |
| F7B6D0     | Alpha-galactosidase                    | GLA          | 2.23E+07 | 7.62E+07 | 4.19E+07 |  |  |  |  |  |
| F7C8R2     | Tetraspanin                            | CD82         | 2.24E+07 | 2.65E+07 | 2.53E+07 |  |  |  |  |  |
| F6VBA3     |                                        | SYTL1        | 2.36E+07 | 2.71E+07 |          |  |  |  |  |  |
| Q9GKX8     | shock protein HSP 90-beta              | HSP90AB1     | 2.42E+07 | 2.26E+07 | 1.57E+07 |  |  |  |  |  |
| Q15836     | membrane protein 3                     | VAMP3        | 2.62E+07 | 1.46E+07 |          |  |  |  |  |  |
| F6SUZ2     | UDP-glucose 4-epimerase                | GALE         | 2.93E+07 | 2.88E+07 |          |  |  |  |  |  |
| F6Q3S6     | associated domain containing 1         | PRADC1       | 3.01E+07 | 3.16E+07 | 2.96E+07 |  |  |  |  |  |
| F6ZAQ9     | trafficking 1                          | VTA1         | 3.07E+07 | 2.84E+07 |          |  |  |  |  |  |
| F6XSF7     | C4a anaphylatoxin                      | LOC100059239 | 3.16E+07 | 2.40E+07 |          |  |  |  |  |  |
| A0A3Q2HSC6 | Endoglin                               | ENG          | 3.19E+07 | 2.17E+07 |          |  |  |  |  |  |
| P01024     | C3-beta-c                              | C3           | 3.19E+07 | 2.60E+07 | 5.79E+07 |  |  |  |  |  |
| F6SFY3     | 15, cell surface associated            | MUC15        | 3.22E+07 | 5.12E+07 | 3.92E+07 |  |  |  |  |  |
| A0A3Q2H332 | synthetase short chain family member 2 | ACSS2        | 3.37E+07 | 2.43E+07 | 3.79E+07 |  |  |  |  |  |
| A0A3Q2IG74 | Podocalyxin                            | PODXL        | 3.39E+07 | 3.07E+07 | 2.40E+07 |  |  |  |  |  |
| F6Q5L6     | purinoceptor                           | P2RX7        | 3.42E+07 | 5.79E+07 | 3.19E+07 |  |  |  |  |  |
| F6WPD2     | protein                                | IFI27        | 3.46E+07 | 4.31E+07 | 3.99E+07 |  |  |  |  |  |
| A0A3Q2IDD2 | C3/C5 convertase                       | CFB          | 3.49E+07 |          | 4.72E+07 |  |  |  |  |  |
| F7BC79     | Syntaxin 3                             | STX3         | 3.61E+07 | 3.69E+07 | 2.92E+07 |  |  |  |  |  |
| F6S8C6     | PDZ domain containing family member 2  | GIPC2        | 3.64E+07 | 3.22E+07 | 1.05E+07 |  |  |  |  |  |
| F6ZHQ5     | intracellular channel protein          | CLIC1        | 3.64E+07 | 2.28E+07 | 2.16E+07 |  |  |  |  |  |
| Q5T749     | proline-rich protein                   | KPRP         | 3.67E+07 | 1.89E+07 |          |  |  |  |  |  |
| F6YCC0     | Cystatin A                             | CSTA         | 3.77E+07 | 3.61E+07 | 3.56E+07 |  |  |  |  |  |

|            |                                     |              |          |          |          |  |  |  |  |  |
|------------|-------------------------------------|--------------|----------|----------|----------|--|--|--|--|--|
| A0A3Q2L2R4 | domain-containing protein           | LOC100051562 | 3.81E+07 | 4.64E+07 | 4.43E+07 |  |  |  |  |  |
| F6TLH4     | carrier-associated membrane protein | SCAMP2       | 3.85E+07 | 2.99E+07 | 2.39E+07 |  |  |  |  |  |
| U3MI26     | (Fragment)                          | CD105        | 3.87E+07 | 4.21E+07 |          |  |  |  |  |  |
| A0A3Q2GUH6 | peroxidase                          | GPX4         | 3.88E+07 | 6.03E+07 | 2.35E+07 |  |  |  |  |  |
| F6YNH6     |                                     | CTSB         | 3.97E+07 | 3.42E+07 | 3.72E+07 |  |  |  |  |  |
| K9K2D2     | dehydrogenase                       |              | 4.00E+07 | 2.95E+07 |          |  |  |  |  |  |
| F6XM13     | Apolipoprotein D                    | APOD         | 4.06E+07 | 5.36E+07 | 2.97E+07 |  |  |  |  |  |
| F6W9B1     | domain-containing protein           | ST13         | 4.10E+07 | 4.80E+07 | 2.29E+07 |  |  |  |  |  |
| K9K4J7     | chaperone 1-like protein (Fragment) |              | 4.24E+07 | 4.42E+07 | 5.50E+07 |  |  |  |  |  |
| K9K410     | phosphatase type IVA 2-like protein |              | 4.24E+07 | 8.17E+07 | 7.15E+07 |  |  |  |  |  |
| A0A3Q2H3D5 |                                     | CD81         | 4.25E+07 | 4.39E+07 | 4.14E+07 |  |  |  |  |  |
| F6Y3Z2     | like proto-oncogene A               | RALA         | 4.32E+07 | 9.83E+07 | 8.07E+07 |  |  |  |  |  |
| P01008     | Antithrombin-III                    | SERPINC1     | 4.50E+07 | 1.67E+08 |          |  |  |  |  |  |
| A0A3Q2H198 | protein                             | LOC111769297 | 4.61E+07 | 6.80E+07 | 2.33E+07 |  |  |  |  |  |
| F6TIR2     | Lipocalin 2                         | LCN2         | 4.81E+07 |          | 2.72E+08 |  |  |  |  |  |
| F7BPX8     | protein                             | CTSV         | 4.86E+07 | 6.71E+07 | 8.41E+07 |  |  |  |  |  |
| Q9TQW8     | (Fragment)                          |              | 4.87E+07 | 3.51E+07 |          |  |  |  |  |  |
| A0A3Q2LL78 | S1 domain-containing protein        | LOC100055297 | 5.20E+07 | 4.14E+07 | 1.15E+08 |  |  |  |  |  |
| F7C7V8     | Semaphorin 7A                       | SEMA7A       | 5.62E+07 | 4.88E+07 | 5.02E+07 |  |  |  |  |  |
| F7AVT9     | protein                             | LOC100071734 | 5.63E+07 | 4.89E+07 | 2.83E+07 |  |  |  |  |  |
| F6VUW2     | Cathepsin S                         | CTSS         | 5.91E+07 | 8.46E+07 | 7.31E+07 |  |  |  |  |  |
| Q6TGR2     | co-receptor MD-2                    |              | 5.92E+07 | 5.57E+07 | 3.90E+07 |  |  |  |  |  |
| F6VJR6     | Alpha-1B-glycoprotein               | A1BG         | 6.05E+07 | 4.91E+07 | 7.41E+07 |  |  |  |  |  |
| F7AKG6     | methylcytosine dioxygenase 3        | TET3         | 6.05E+07 | 1.15E+08 |          |  |  |  |  |  |
| F6T0P6     | vitamin D binding protein           | GC           | 6.07E+07 | 6.09E+07 | 7.66E+07 |  |  |  |  |  |
| A0A3Q2I2H1 | domain-containing protein           |              | 6.22E+07 | 1.02E+08 | 1.42E+08 |  |  |  |  |  |
| F7C450     | 2-HS glycoprotein                   | AHSG         | 6.42E+07 | 7.10E+07 | 9.47E+07 |  |  |  |  |  |
| A0A3Q2ICL4 | protein                             | LOC111767442 | 6.48E+07 | 3.75E+07 | 3.03E+07 |  |  |  |  |  |
| F7CFK9     | cell derived factor 2               | SDF2         | 6.60E+07 | 5.78E+07 |          |  |  |  |  |  |
| Q14697     | alpha-glucosidase AB                | GANAB        | 7.27E+07 |          | 4.37E+07 |  |  |  |  |  |
| A0A3Q2HBP1 | binding protein 1                   | HEBP1        | 7.50E+07 | 1.03E+08 | 8.62E+07 |  |  |  |  |  |

|            |                                               |              |          |          |          |  |  |  |  |  |
|------------|-----------------------------------------------|--------------|----------|----------|----------|--|--|--|--|--|
| F7DJZ1     | domain-containing protein                     |              | 7.83E+07 | 5.58E+07 |          |  |  |  |  |  |
| F6UJ33     | Profilin                                      | PFN1         | 7.83E+07 | 5.20E+07 |          |  |  |  |  |  |
| A0A3Q2H5J5 | RAB10                                         | RAB10        | 8.04E+07 | 6.82E+07 | 6.46E+07 |  |  |  |  |  |
| A0A3Q2L3I3 | Clusterin                                     | CLU          | 8.10E+07 | 8.78E+07 | 1.52E+08 |  |  |  |  |  |
| F7CSL8     | domain-containing protein                     | SPI2         | 8.10E+07 | 8.47E+07 | 1.04E+08 |  |  |  |  |  |
| A0A3Q2KY85 |                                               | APOH         | 8.33E+07 | 5.94E+07 | 6.92E+07 |  |  |  |  |  |
| F6TF18     | BAX inhibitor motif containing 1              | TMBIM1       | 8.85E+07 | 1.30E+08 | 1.06E+08 |  |  |  |  |  |
| F6VGG1     | ribosomal protein S12                         | RPS12        | 8.97E+07 | 5.10E+07 | 2.88E+07 |  |  |  |  |  |
| A0A0A1E464 | lambda light chain variable region (Fragment) | IGL          | 9.53E+07 | 1.05E+08 | 1.35E+08 |  |  |  |  |  |
| P0DN28     | C-III                                         | APOC3        | 9.87E+07 | 2.15E+08 | 2.24E+08 |  |  |  |  |  |
| F6V812     | N-acetyl-alpha-glucosaminidase                | NAGLU        | 1.00E+08 | 7.93E+07 | 5.70E+07 |  |  |  |  |  |
| F6QXW2     | binding protein 1                             | PEBP1        | 1.00E+08 |          | 4.78E+07 |  |  |  |  |  |
| F6QK77     | Deoxyribonuclease                             | DNASE1L1     | 1.02E+08 | 2.06E+08 | 1.49E+08 |  |  |  |  |  |
| F7DZ70     | member RAS oncogene family                    | RAB3D        | 1.07E+08 | 1.60E+08 | 1.23E+08 |  |  |  |  |  |
| O97973     | (Fragment)                                    |              | 1.11E+08 | 8.57E+07 | 1.27E+08 |  |  |  |  |  |
| A0A3Q2HRU9 | binding protein                               | SDCBP        | 1.19E+08 | 1.05E+08 | 1.04E+08 |  |  |  |  |  |
| F7C603     | phosphodiesterase acid like 3B                | SMPDL3B      | 1.31E+08 | 2.51E+08 | 6.28E+07 |  |  |  |  |  |
| P01860     | heavy constant gamma 3                        | IGHG3        | 1.32E+08 | 3.91E+07 | 3.20E+07 |  |  |  |  |  |
| A0A3Q2HQ25 | protein                                       | LOC100054641 | 1.34E+08 | 6.27E+07 |          |  |  |  |  |  |
| F6UL68     | Transthyretin                                 | TTR          | 1.35E+08 | 1.17E+08 | 1.08E+08 |  |  |  |  |  |
| F6SX98     | aldolase                                      | ALDOA        | 1.36E+08 | 3.42E+07 | 5.16E+07 |  |  |  |  |  |
| F7BV85     | heavy chain                                   | CLTC         | 1.36E+08 | 7.64E+07 | 7.87E+07 |  |  |  |  |  |
| A0A0A1E417 | lambda light chain variable region (Fragment) | IGL          | 1.49E+08 | 1.14E+08 | 1.99E+08 |  |  |  |  |  |
| Q0R0D3     | class I antigen                               | Eqca-16      | 1.51E+08 | 2.70E+08 | 1.24E+08 |  |  |  |  |  |
| P47710     | Alpha-S1-casein                               | CSN1S1       | 1.57E+08 | 2.14E+07 | 2.32E+07 |  |  |  |  |  |
| Q5XWB8     | receptor (Fragment)                           | CD14         | 1.62E+08 | 2.19E+08 | 1.84E+08 |  |  |  |  |  |
| F7C1X7     | exchange regulatory cofactor NHE-RF           | SLC9A3R1     | 1.63E+08 | 1.06E+08 | 8.58E+07 |  |  |  |  |  |
| A0A3Q2L6D8 | cell death 6 interacting protein              | PDCD6IP      | 1.65E+08 | 1.67E+08 |          |  |  |  |  |  |

|            |                                                    |              |          |          |          |  |  |  |  |  |
|------------|----------------------------------------------------|--------------|----------|----------|----------|--|--|--|--|--|
| F7CXT0     | b reductase 1                                      | CYBRD1       | 1.68E+08 | 1.84E+08 | 2.25E+08 |  |  |  |  |  |
| F6Y688     | cyclase/mutase family member                       | LSS          | 1.76E+08 | 2.84E+08 | 2.38E+08 |  |  |  |  |  |
| F6T835     | Tetraspanin                                        | TSPAN6       | 1.78E+08 | 1.10E+08 | 5.83E+07 |  |  |  |  |  |
| F6S3Y7     | S100                                               | S100G        | 1.84E+08 | 1.72E+08 | 1.61E+08 |  |  |  |  |  |
| A0A3Q2I2V3 | A1 domain-containing protein                       | CTSD         | 1.92E+08 | 1.99E+08 | 2.48E+08 |  |  |  |  |  |
| A0A3Q2LRH1 | carrier family 36 member 1                         | SLC36A1      | 1.94E+08 | 5.99E+08 | 3.33E+08 |  |  |  |  |  |
| A0A3Q2KP77 | protein                                            | DEFB1        | 2.04E+08 | 8.74E+07 | 2.84E+07 |  |  |  |  |  |
| A0A3Q2HM99 | protein                                            | LOC102148710 | 2.11E+08 |          | 1.50E+08 |  |  |  |  |  |
| Q863B0     | Beta-2-microglobulin                               | b-2-m        | 2.12E+08 | 1.29E+08 | 9.24E+07 |  |  |  |  |  |
| F6VBP9     | E                                                  | APOE         | 2.27E+08 | 3.06E+08 | 3.36E+08 |  |  |  |  |  |
| A0A3Q2LFM9 | cytoplasmic 1 intermediate chain 1                 | DYNC111      | 2.44E+08 | 2.87E+08 | 2.96E+08 |  |  |  |  |  |
| A5YBL8     | cis-trans isomerase                                | PPIB         | 2.59E+08 | 1.65E+08 | 1.76E+08 |  |  |  |  |  |
| F6TT70     | protein                                            | LOC100146423 | 2.60E+08 | 5.50E+08 | 6.84E+08 |  |  |  |  |  |
| A0A3Q2I5T2 | domain-containing protein                          | CST3         | 2.66E+08 | 2.55E+08 | 3.11E+08 |  |  |  |  |  |
| F6RI26     | dehydrogenase 9 family member A1                   | ALDH9A1      | 2.75E+08 | 1.56E+08 |          |  |  |  |  |  |
| P08334     | A                                                  |              | 2.84E+08 | 2.46E+08 |          |  |  |  |  |  |
| A0A3Q2ID55 | carrier family 4 member 9                          | SLC4A9       | 2.97E+08 | 4.85E+08 | 6.17E+08 |  |  |  |  |  |
| F5CEP2     | fat globule-EGF factor 8 splice variant (Fragment) | MFGE-8       | 3.19E+08 | 4.45E+08 |          |  |  |  |  |  |
| F6WG98     |                                                    | SLC6A14      | 3.21E+08 | 3.52E+08 | 3.43E+08 |  |  |  |  |  |
| M9ZUR8     | S-transferase A1                                   | GSTA1        | 3.28E+08 | 2.47E+08 | 2.06E+08 |  |  |  |  |  |
| A0A3Q2HWQ6 | C3-beta-c                                          | LOC100060505 | 3.60E+08 | 4.83E+07 | 2.51E+08 |  |  |  |  |  |
| A0A3Q2H3T6 | protein                                            | MFGE8        | 3.73E+08 | 3.13E+08 | 3.47E+08 |  |  |  |  |  |
| A0A3Q2IBR6 | repeat containing protein X-linked                 | SRPX         | 3.93E+08 | 3.18E+08 | 2.97E+08 |  |  |  |  |  |
| C0HJR4     | (Fragment)                                         | MFGE8        | 3.94E+08 | 4.02E+08 | 2.81E+08 |  |  |  |  |  |
| F6USP9     |                                                    | PLG          | 3.95E+08 | 2.59E+08 | 2.24E+08 |  |  |  |  |  |
| A0A0A1E6E8 | lambda light chain variable region (Fragment)      | IGL          | 4.00E+08 | 1.27E+09 | 1.37E+09 |  |  |  |  |  |
| F7A684     | protein                                            | IFI27        | 4.13E+08 | 4.43E+08 | 5.55E+08 |  |  |  |  |  |
| F6X8Q2     | phosphoglucomutase 1                               | PGM1         | 4.64E+08 | 1.48E+08 | 1.22E+08 |  |  |  |  |  |
| F6SQS6     | like 7A                                            | METTL7A      | 4.68E+08 | 7.11E+08 | 4.34E+08 |  |  |  |  |  |

|            |                                                      |              |          |          |          |  |  |  |  |  |
|------------|------------------------------------------------------|--------------|----------|----------|----------|--|--|--|--|--|
| Q865P6     | Beta-defensin 1                                      | defb1        | 4.69E+08 | 1.18E+08 | 1.12E+08 |  |  |  |  |  |
| F6VKB4     |                                                      | CSN3         | 4.80E+08 | 4.36E+08 | 4.68E+08 |  |  |  |  |  |
| B5BV04     | Alpha-1-antitrypsin                                  | Spi2-5       | 5.16E+08 | 4.33E+08 | 7.69E+08 |  |  |  |  |  |
| H9GZR2     | protein                                              |              | 5.49E+08 | 3.31E+08 | 3.04E+08 |  |  |  |  |  |
| F6Y0D9     | Cadherin-1                                           | CDH1         | 5.57E+08 | 6.51E+08 | 6.16E+08 |  |  |  |  |  |
| A0A3Q2IBE3 | uridylyltransferase                                  | UGP2         | 5.60E+08 | 2.40E+08 | 1.97E+08 |  |  |  |  |  |
| F6RM73     | Apolipoprotein A-II                                  | APOA2        | 5.61E+08 | 4.98E+08 | 6.39E+08 |  |  |  |  |  |
| H9GZQ9     | protein                                              |              | 6.07E+08 | 5.34E+08 | 1.07E+09 |  |  |  |  |  |
| A0A3Q2GVQ5 | precursor                                            | GRN          | 7.74E+08 | 6.36E+08 | 6.30E+08 |  |  |  |  |  |
| P19857     | amyloid A protein                                    | SAA1         | 8.29E+08 | 1.17E+09 | 4.92E+08 |  |  |  |  |  |
| F6PH38     | beta chain                                           | FGB          | 9.01E+08 | 2.94E+09 | 3.02E+09 |  |  |  |  |  |
| Q6X9W5     | amyloid A protein<br>(Fragment)                      | SAA          | 1.08E+09 | 6.42E+08 | 9.11E+08 |  |  |  |  |  |
| F7AYT5     | synthetase long chain<br>family member 4             | ACSL4        | 1.34E+09 | 1.78E+09 | 9.13E+08 |  |  |  |  |  |
| A0A3Q2GXW2 | domain-containing<br>protein                         | CIDEA        | 1.54E+09 | 2.26E+09 | 2.08E+09 |  |  |  |  |  |
| A0A0A1E4I0 | lambda light chain<br>variable region<br>(Fragment)  | IGL          | 1.55E+09 | 8.73E+08 | 8.89E+08 |  |  |  |  |  |
| F6VF11     | like 2                                               | CHRD12       | 1.69E+09 | 1.32E+09 | 1.48E+09 |  |  |  |  |  |
| F6W3F0     | fibrocystin/polyductin                               | PKHD1        | 3.02E+09 | 1.12E+10 | 1.27E+10 |  |  |  |  |  |
| P08896     | B/C                                                  |              | 4.01E+09 | 3.17E+09 | 3.42E+09 |  |  |  |  |  |
| H9GZU8     | protein                                              |              | 4.44E+09 | 2.49E+09 | 4.57E+09 |  |  |  |  |  |
| F7BL38     | domain-containing<br>protein                         | MUC1         | 4.54E+09 | 5.05E+09 | 3.48E+09 |  |  |  |  |  |
| F6XGE0     | protein                                              | CD55         | 4.86E+09 | 5.97E+09 | 3.94E+09 |  |  |  |  |  |
| F7CWC8     | oxidase                                              | LOC100147151 | 5.48E+09 | 8.88E+09 | 1.14E+10 |  |  |  |  |  |
| H9GZT5     | protein                                              |              | 6.83E+09 | 5.38E+09 | 6.37E+09 |  |  |  |  |  |
| H9GZN9     | protein                                              |              | 7.14E+09 | 9.70E+09 | 1.14E+10 |  |  |  |  |  |
| Q95M34     | gamma 1 heavy chain<br>constant region<br>(Fragment) | IGHC1        | 8.81E+09 | 9.06E+09 | 8.53E+09 |  |  |  |  |  |
| P11376     | C, milk isozyme                                      | LYZ          | 2.03E+10 | 1.59E+10 | 1.48E+10 |  |  |  |  |  |
| A0A0A1E9A8 | lambda light chain<br>variable region<br>(Fragment)  | IGL          | 2.29E+10 | 2.38E+10 | 4.72E+09 |  |  |  |  |  |
| P82187     |                                                      | CSN3         | 3.74E+10 | 2.79E+10 | 1.18E+10 |  |  |  |  |  |
| K9K4B2     | protein Rab-8B-like<br>protein                       | RAB8B        |          | 6.38E+06 | 7.27E+06 |  |  |  |  |  |
| Q6UWP8     |                                                      | SBSN         |          | 9.15E+06 | 1.61E+07 |  |  |  |  |  |

|            |                                                 |         |  |          |          |  |  |  |  |  |
|------------|-------------------------------------------------|---------|--|----------|----------|--|--|--|--|--|
| F6R942     |                                                 | A2M     |  | 1.15E+07 | 1.24E+07 |  |  |  |  |  |
| A0A3Q2L0G4 | domain-containing protein                       | SRSF4   |  | 1.64E+07 | 1.20E+08 |  |  |  |  |  |
| A0A3Q2GV97 |                                                 | NPTN    |  | 1.98E+07 | 1.54E+07 |  |  |  |  |  |
| F7DG10     | H <sup>+</sup> transporting accessory protein 1 | ATP6AP1 |  | 4.10E+07 | 3.04E+07 |  |  |  |  |  |
| F7CAC5     | domain-containing protein                       |         |  | 5.21E+08 | 1.52E+08 |  |  |  |  |  |

### 1.2 Information for each significantly down-regulated protein (P < 0.05) identified in DM vs HM group

| UniProt Accession no. | Protein Name                          | Gene Name | LFQ intensity |          |          |          |          |          | Fold change | t test p value |
|-----------------------|---------------------------------------|-----------|---------------|----------|----------|----------|----------|----------|-------------|----------------|
|                       |                                       |           | DM-1          | DM-2     | DM-3     | HM-1     | HM-2     | HM-3     |             |                |
| F6R7J2                | dehydrogenase (NADP(+)) 1, cytosolic  | IDH1      | 1.02E+08      | 7.32E+07 | 7.22E+07 | 1.88E+08 | 1.46E+08 | 1.62E+08 | 4.97E-01    | 5.99E-03       |
| A0A3Q2I0E0            | member RAS oncogene family            | RAB14     | 1.64E+07      | 1.44E+07 | 9.06E+06 |          | 2.86E+07 | 2.92E+07 | 4.60E-01    | 1.18E-02       |
| K9K3M3                | protein Rab-18-like protein           |           | 1.14E+09      | 1.48E+09 | 1.16E+09 | 2.43E+09 | 2.22E+09 | 3.69E+09 | 4.54E-01    | 3.25E-02       |
| C7E3N6                | fatty acid-binding protein            | FABP3     | 1.69E+09      | 1.70E+09 | 1.70E+09 | 3.98E+09 | 2.93E+09 | 4.99E+09 | 4.27E-01    | 1.89E-02       |
| K9K4D8                | protein RhoA-like protein             | RHOA      | 2.57E+08      | 2.14E+08 | 2.35E+08 | 4.70E+08 | 5.18E+08 | 7.59E+08 | 4.04E-01    | 1.83E-02       |
| F6XAB0                | protein                               | SNAP23    | 7.11E+07      | 7.91E+07 | 6.03E+07 | 1.94E+08 | 1.98E+08 | 2.44E+08 | 3.31E-01    | 1.08E-03       |
| F6Q6E8                | binding cassette subfamily G member 2 | ABCG2     | 5.51E+08      | 9.29E+08 | 5.15E+08 | 1.84E+09 | 1.73E+09 | 2.50E+09 | 3.29E-01    | 7.77E-03       |
| A0A3Q2KK41            | member RAS oncogene family            | RAB1A     | 6.44E+08      | 1.95E+08 | 2.08E+08 | 1.09E+09 | 8.17E+08 | 1.49E+09 | 3.09E-01    | 3.28E-02       |
| A0A3Q2H179            | carrier family 39 member 8            | SLC39A8   | 9.38E+07      | 7.93E+07 | 6.12E+07 | 2.79E+08 | 1.95E+08 | 3.17E+08 | 2.96E-01    | 7.43E-03       |
| F6U904                | molecule                              | CD36      | 9.51E+08      | 7.20E+08 | 3.35E+08 | 2.39E+09 | 2.33E+09 | 4.76E+09 | 2.11E-01    | 3.84E-02       |
| F7CTF0                | hormone-related protein               | PTHLH     | 5.39E+07      | 5.56E+07 | 6.17E+07 | 4.76E+08 | 2.67E+08 | 3.04E+08 | 1.63E-01    | 1.05E-02       |
| F6QUF7                | lipase                                | LPL       | 7.31E+08      | 1.98E+09 | 1.10E+09 | 1.09E+10 | 6.34E+09 | 6.18E+09 | 1.63E-01    | 1.49E-02       |
| Q99943                | acyltransferase alpha                 | AGPAT1    | 5.76E+07      | 8.99E+07 | 6.57E+07 | 5.21E+08 | 4.48E+08 | 5.31E+08 | 1.42E-01    | 1.01E-04       |
| F6TGW9                | b5 reductase                          | CYB5R3    | 7.37E+07      | 1.94E+08 | 1.37E+08 | 8.09E+08 | 9.42E+08 | 1.21E+09 | 1.37E-01    | 2.20E-03       |
| A0A3Q2HQY6            | domain-containing protein             | FOLR2     | 1.20E+07      | 3.36E+07 | 1.78E+07 | 1.64E+08 |          | 1.81E+08 | 1.23E-01    | 7.09E-04       |
| P05413                | acid-binding protein, heart           | FABP3     | 5.18E+08      | 3.63E+08 | 4.06E+08 | 3.66E+09 | 3.42E+09 | 3.75E+09 | 1.19E-01    | 7.60E-06       |
| A0A3Q2KN19            | protein                               | NUCB1     | 6.91E+07      | 5.93E+07 | 1.34E+08 | 1.47E+09 | 6.71E+08 | 9.23E+08 | 8.57E-02    | 1.67E-02       |



|            |                                                   |          |          |          |  |          |          |          |          |          |
|------------|---------------------------------------------------|----------|----------|----------|--|----------|----------|----------|----------|----------|
| K9K2R3     | (Fragment)                                        |          | 9.86E+06 | 4.05E+06 |  | 3.51E+08 | 5.36E+08 | 5.69E+08 | 1.43E-02 | 1.21E-02 |
| Q14390     | hydrolase light chain 2                           | GGTLC2   |          |          |  | 1.13E+08 | 1.24E+08 | 1.47E+08 |          |          |
| O00481     | subfamily 3 member A1                             | BTN3A1   |          |          |  | 2.70E+07 | 3.86E+07 | 6.16E+07 |          |          |
| O00754     | alpha-mannosidase                                 | MAN2B1   |          |          |  | 6.82E+07 | 6.52E+07 | 4.90E+07 |          |          |
| O60543     | death activator CIDE-A                            | CIDEA    |          |          |  | 5.69E+08 | 5.47E+08 | 1.21E+09 |          |          |
| O95084     | protease 23                                       | PRSS23   |          |          |  | 2.23E+08 | 3.55E+08 | 2.87E+08 |          |          |
| P00441     | dismutase [Cu-Zn]                                 | SOD1     |          |          |  |          | 3.56E+07 | 3.11E+07 |          |          |
| P01833     | immunoglobulin receptor                           | PIGR     |          |          |  | 4.86E+08 | 3.67E+08 | 5.23E+08 |          |          |
| P05186     | phosphatase, tissue-nonspecific isozyme           | ALPL     |          |          |  | 1.11E+07 | 8.40E+06 | 3.05E+07 |          |          |
| P05423     | RNA polymerase III subunit RPC4                   | POLR3D   |          |          |  | 4.93E+10 | 4.28E+10 | 3.27E+10 |          |          |
| P07339     | D                                                 | CTSD     |          |          |  |          | 1.07E+08 | 9.81E+07 |          |          |
| F7CK20     | kinase                                            | FGR      |          |          |  | 4.25E+07 | 4.47E+07 | 4.83E+07 |          |          |
| P16403     | H1.2                                              | HIST1H1C |          |          |  | 6.70E+07 | 1.01E+09 | 6.72E+07 |          |          |
| A0A3Q2HUK6 | domain-containing protein                         | HIST1H1B |          |          |  |          | 1.90E+08 | 1.25E+07 |          |          |
| P22079     |                                                   | LPO      |          |          |  | 7.07E+07 | 1.18E+08 |          |          |          |
| F6RA08     |                                                   | STOM     |          |          |  | 1.95E+08 | 7.54E+08 | 2.64E+08 |          |          |
| K9KD26     | aldehyde dehydrogenase-like protein (Fragment)    |          |          |          |  | 2.79E+07 | 1.73E+07 | 3.34E+07 |          |          |
| P34096     | 4                                                 | RNASE4   |          |          |  | 1.57E+09 | 1.99E+09 | 2.52E+09 |          |          |
| F6WCS1     | heavy chain 9                                     | MYH9     |          |          |  |          | 1.10E+08 | 1.13E+07 |          |          |
| Q9TUL9     | inhibitor 3                                       | TIMP3    |          |          |  | 1.59E+09 | 1.20E+09 | 1.18E+09 |          |          |
| P47989     | dehydrogenase/oxidase                             | XDH      |          |          |  | 1.66E+09 | 1.49E+09 | 1.45E+09 |          |          |
| P48449     | synthase                                          | LSS      |          |          |  | 1.40E+08 | 9.87E+07 | 2.43E+08 |          |          |
| A0A3Q2LC76 | ESCRT-III associated factor                       | IST1     |          |          |  | 1.85E+07 | 1.86E+07 | 2.06E+07 |          |          |
| P55259     | secretory granule membrane major glycoprotein GP2 | GP2      |          |          |  | 8.18E+08 | 7.11E+08 | 1.06E+09 |          |          |
| P60660     | light polypeptide 6                               | MYL6     |          |          |  | 4.92E+06 | 3.88E+07 |          |          |          |
| P80511     | S100-A12                                          | S100A12  |          |          |  | 7.46E+07 | 1.02E+08 |          |          |          |
| P81605     |                                                   | DCD      |          |          |  | 1.06E+08 | 2.08E+07 | 2.73E+07 |          |          |
| Q08431     |                                                   | MFGE8    |          |          |  | 1.57E+09 | 6.69E+09 | 1.07E+10 |          |          |
| F6QMB8     | protein subunit alpha 13                          | GNA13    |          |          |  | 1.13E+08 | 1.19E+08 | 1.49E+08 |          |          |
| K9KD98     | receptor (Fragment)                               |          |          |          |  | 3.72E+07 | 3.64E+07 | 6.10E+07 |          |          |

|            |                                                           |          |  |  |  |          |          |          |  |  |
|------------|-----------------------------------------------------------|----------|--|--|--|----------|----------|----------|--|--|
| A0A3Q2HYJ5 | acyltransferase 4                                         | GPAT4    |  |  |  | 4.28E+07 | 2.65E+07 | 4.32E+07 |  |  |
| K9K4C9     | (Fragment)                                                |          |  |  |  | 9.62E+07 | 8.46E+08 | 1.00E+08 |  |  |
| Q8TBF2     | F synthase                                                | PRXL2B   |  |  |  |          | 3.93E+07 | 5.24E+07 |  |  |
| K9KDJ7     | transport protein 81-like protein-like protein (Fragment) |          |  |  |  | 3.28E+08 | 1.51E+09 | 1.45E+08 |  |  |
| Q92743     | protease HTRA1                                            | HTRA1    |  |  |  | 7.39E+07 | 1.25E+08 | 1.19E+08 |  |  |
| Q96CE8     | 4 L6 family member 18                                     | TM4SF18  |  |  |  | 7.20E+06 | 3.14E+06 | 3.57E+07 |  |  |
| Q99541     |                                                           | PLIN2    |  |  |  | 8.71E+09 | 9.11E+09 | 1.59E+10 |  |  |
| F7CUM5     | and integrin binding 1                                    | CIB1     |  |  |  | 8.90E+07 |          | 9.79E+07 |  |  |
| Q9BXJ0     | C1q tumor necrosis factor-related protein 5               | C1QTNF5  |  |  |  | 1.87E+07 | 7.88E+07 | 9.66E+07 |  |  |
| Q9H1C7     | and transmembrane domain-containing protein 1             | CYSTM1   |  |  |  | 9.20E+07 | 9.05E+07 | 1.62E+08 |  |  |
| Q9HCL2     | acyltransferase 1, mitochondrial                          | GPAM     |  |  |  |          | 2.53E+07 | 2.71E+07 |  |  |
| Q9NZG7     |                                                           | NINJ2    |  |  |  | 1.99E+08 | 5.26E+07 | 2.87E+07 |  |  |
| F7B3U1     | protein-coupled receptor class C group 5 member B         | GPRC5B   |  |  |  | 1.10E+08 | 1.48E+08 | 2.37E+08 |  |  |
| Q9UBS3     | homolog subfamily B member 9                              | DNAJB9   |  |  |  | 7.66E+06 | 1.53E+07 | 1.45E+08 |  |  |
| Q9UNQ0     | cassette sub-family G member 2                            | ABCG2    |  |  |  | 2.18E+09 | 2.49E+09 | 3.64E+09 |  |  |
| Q9Y4Z0     | snRNA-associated Sm-like protein LSM4                     | LSM4     |  |  |  | 3.16E+10 | 4.04E+10 | 6.12E+10 |  |  |
| K9K9N6     | domain-containing protein 1-like protein (Fragment)       |          |  |  |  | 3.06E+08 | 2.83E+08 | 3.38E+08 |  |  |
| Q9Y5G8     | gamma-A5                                                  | PCDHGA5  |  |  |  | 4.14E+07 | 2.86E+07 | 4.85E+07 |  |  |
| F6TN81     | G, endothelial type                                       | LIPG     |  |  |  | 1.36E+07 | 4.93E+07 | 5.99E+07 |  |  |
| A0A3Q2GU69 | v-SNARE homolog                                           | YKT6     |  |  |  | 6.70E+07 | 8.38E+07 | 1.12E+08 |  |  |
| A0A3Q2GYF5 | phosphatase                                               | ALPL     |  |  |  | 1.07E+08 | 8.24E+07 | 1.81E+08 |  |  |
| A0A3Q2KMN3 | rich secretory protein LCCL domain containing 2           | CRISPLD2 |  |  |  | 1.75E+08 | 1.63E+08 | 1.80E+08 |  |  |
| A0A3Q2H6M5 | like 2                                                    | HHIPL2   |  |  |  | 1.67E+09 | 1.84E+09 | 1.47E+09 |  |  |
| A0A3Q2HG76 | protein subunit alpha o1                                  | GNAO1    |  |  |  | 3.03E+07 | 1.75E+07 | 4.17E+07 |  |  |
| A0A3Q2HSB3 |                                                           | LPO      |  |  |  | 2.46E+09 | 2.14E+09 | 2.43E+09 |  |  |
| F7B5C4     |                                                           | VIM      |  |  |  | 3.25E+07 | 7.43E+08 | 6.29E+07 |  |  |

|            |                                                      |              |  |  |  |          |          |          |  |  |
|------------|------------------------------------------------------|--------------|--|--|--|----------|----------|----------|--|--|
| F7CAB8     | 1, zinc-binding                                      | AZGP1        |  |  |  | 9.36E+08 | 6.82E+08 | 7.15E+08 |  |  |
| A0A3Q2KJE2 | cotransporter                                        | LOC111772073 |  |  |  | 5.41E+08 | 4.99E+08 | 5.77E+08 |  |  |
| F6HXH6     | type XVIII alpha 1 chain                             | COL18A1      |  |  |  | 1.87E+07 | 2.10E+07 | 9.22E+06 |  |  |
| F6V3X9     | protein                                              | MAN2B1       |  |  |  | 4.34E+07 | 6.81E+07 | 1.73E+07 |  |  |
| A0A3Q2LEZ9 | binding lectin serine peptidase 1                    | MASP1        |  |  |  | 1.53E+07 |          | 1.12E+07 |  |  |
| A0A3Q2LT54 | binding protein 2                                    | STXBP2       |  |  |  | 2.77E+07 | 3.48E+07 | 2.29E+07 |  |  |
| K9K2N5     | protein subfamily B member 9-like protein (Fragment) |              |  |  |  | 2.66E+08 | 1.57E+08 | 2.76E+08 |  |  |
| F6SZJ2     | domain containing 4                                  | EHD4         |  |  |  |          | 3.16E+07 | 4.31E+07 |  |  |
| F6VZN7     | homolog family member G                              | RHOG         |  |  |  | 1.85E+07 | 4.16E+07 | 2.47E+07 |  |  |
| F6WR95     | oxidase                                              | QSOX1        |  |  |  | 1.32E+09 | 1.33E+09 | 1.15E+09 |  |  |
| F6YQM5     |                                                      | PSAP         |  |  |  | 1.41E+08 | 6.19E+07 | 8.05E+07 |  |  |
| F6ZBH7     | nucleotide exchange factor                           | SIL1         |  |  |  | 8.81E+07 | 5.98E+07 | 6.84E+07 |  |  |
| K9KB03     | GDP-dissociation inhibitor 2-like protein            |              |  |  |  | 6.55E+06 | 2.24E+07 |          |  |  |
| F7BKA2     | kinase                                               | PDXK         |  |  |  | 7.58E+07 | 8.48E+07 | 2.17E+08 |  |  |
| F7BYW1     | 2                                                    | ADM2         |  |  |  | 2.48E+07 | 2.75E+07 | 5.13E+07 |  |  |
| F7CLX6     | like EF-hand protein 1                               | CHP1         |  |  |  |          | 4.73E+07 | 1.53E+08 |  |  |
